# Supplementary material
Source: HighWire-hosted journal article supplement (https://spcare.bmj.com/content/8/4/439)
Supplement: inline-supplementary-material-1 [file inline-supplementary-material-1.pdf]

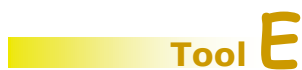

## TRAINER FEEDBACK QUESTIONNAIRE

This toolkit is a 'work in progress' and will be refined and developed using analysis of the completed evaluation forms following learning events and feedback from Facilitators.

As a Facilitator of a learning event, please could you comment on the following aspects of the evaluation toolkit.

**Type of learning event**.....

|                                                                                           | <b>Strongly agree</b> | <b>Agree</b> | <b>Neutral</b> | <b>Disagree</b> | <b>Strongly disagree</b> | <b>Comments</b> |
|-------------------------------------------------------------------------------------------|-----------------------|--------------|----------------|-----------------|--------------------------|-----------------|
| a. I liked the overall format of the toolkit                                              |                       |              |                |                 |                          |                 |
| b. The guidance for use of the toolkit was easy to follow                                 |                       |              |                |                 |                          |                 |
| c. Students have been able to complete Tool A and Tool B as requested                     |                       |              |                |                 |                          |                 |
| d. I feel that Tool A and Tool B have adequately measured the aims of this learning event |                       |              |                |                 |                          |                 |

**Additional comments**.....

.....

.....

.....

.....

.....

Please ensure timetable/learning event outcomes are sent with the completed paired questionnaires

**Facilitators name**.....

**Contact Details:**

**Telephone**.....

**Email**.....
